# Supplementary material
Source: ML conference proceedings conference paper supplement (https://openaccess.thecvf.com/content/CVPR_2019/html/Williams_Deep_Geometric_Prior_CVPR_2019_paper.html)
Supplement: Supplementary file 1 [file Williams_Deep_Geometric_Prior_CVPR_2019_supplemental.pdf]

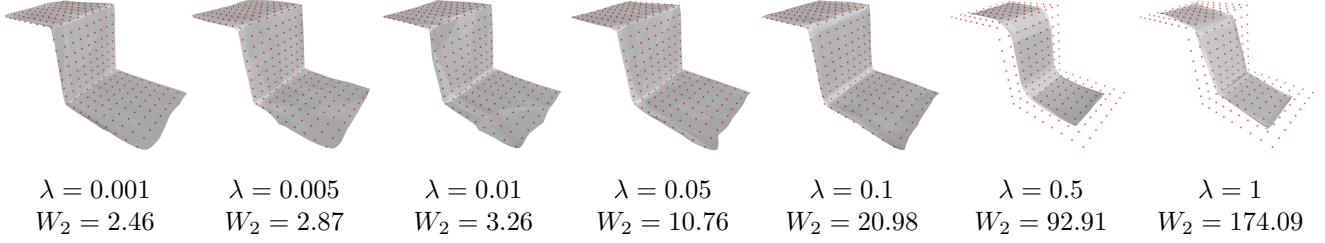

Figure 13. Effect of the parameter  $\lambda$  on the reconstruction and the loss  $W_2$ .

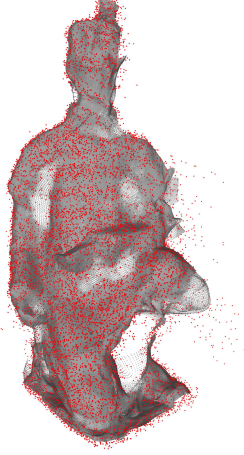

Figure 14. Example of reconstruction from Kinect data (red dots).

## A. Supplementary Experiments

### A.1. Effect of the parameter $\lambda$

In Figure 13, we demonstrate the effect of varying the Sinkhorn regularization parameter on the final reconstruction of a surface. Smaller values of  $\lambda$  yield a better approximation of the Wasserstein distance, and thus, produce better reconstructions of the original points.

### A.2. Kinect reconstruction

To demonstrate the effectiveness of our technique on reconstructing point clouds with large quantities of noise and highly non-uniform sampling, we reconstruct a raw point cloud acquired with a Kinect V2 (Figure 14). In spite of the challenging input, we are still able to produce a smooth reconstruction approximating the geometry of the original object.

### A.3. Surface Reconstruction Benchmark

We provide cumulative histograms for the results of the Surface Reconstruction Benchmark [5] on all 5 models shown in Figure 4. Figures 15 and 16 show respectively the percentage of vertices of  $\hat{\mathcal{Y}}$  and  $\mathcal{X}$  such that  $d_{\text{rec} \rightarrow \text{GT}}$  and  $d_{\text{inp} \rightarrow \text{rec}}$  is below a given error.

### A.4. Surface Reconstruction Benchmark Statistics

In addition to the cumulative histograms above, we tabulate the mean, standard deviation, and maximum values for each method and model in the benchmark. Table 1 show the distance from the input to the reconstruction ( $d_{\text{inp} \rightarrow \text{rec}}$ ) and Table 2 show the distance from the reconstruction to the input ( $d_{\text{rec} \rightarrow \text{GT}}$ ).

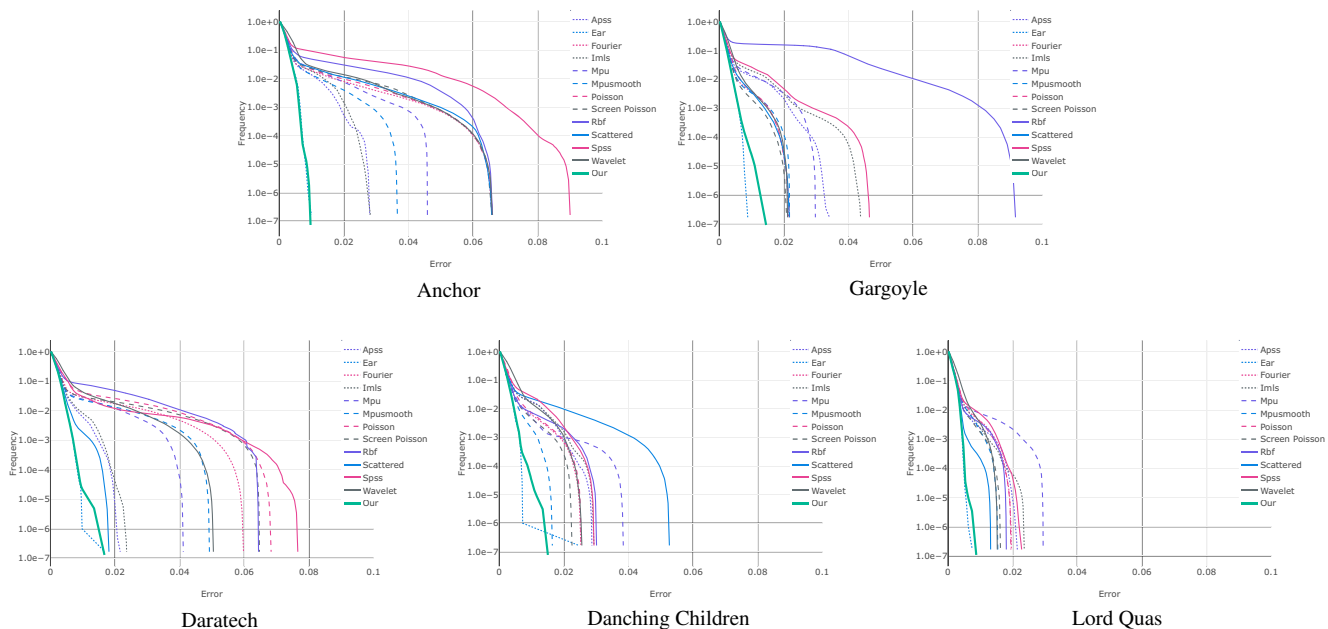

Figure 15. Percentage of fitted vertices ( $y$ -axis, log scale) to reach a certain error level ( $x$ -axis) for different methods. The errors are computed from the fitted surface to the ground truth.

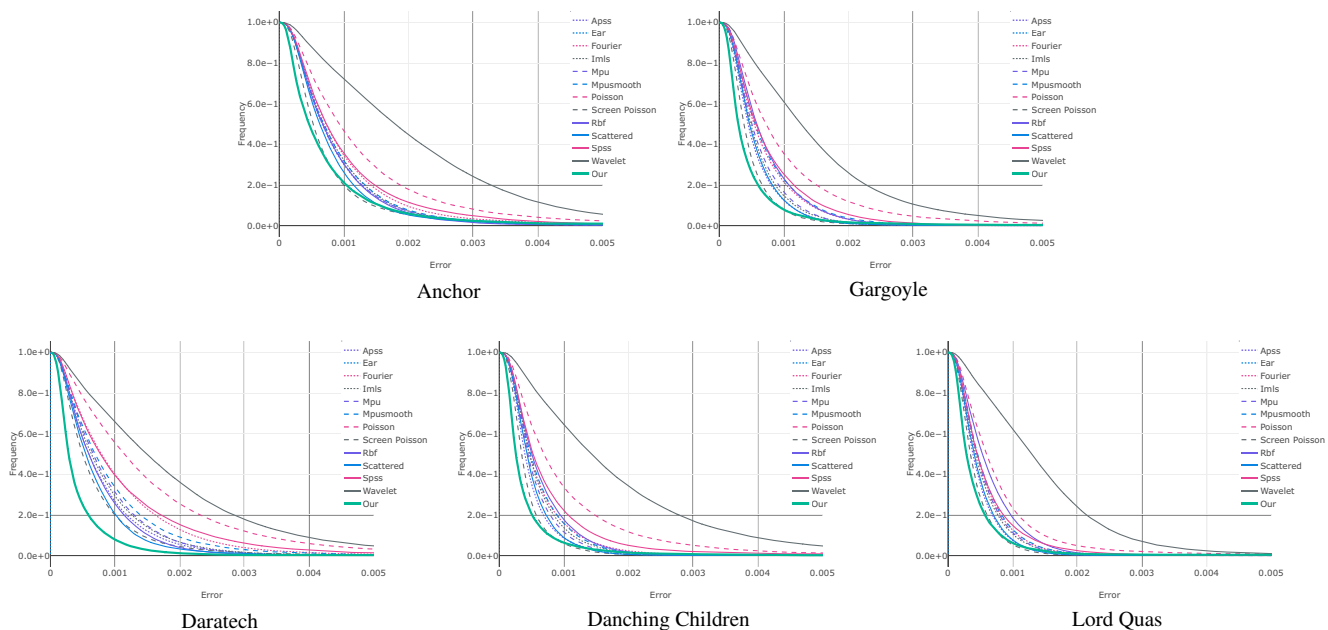

Figure 16. Percentage of fitted vertices ( $y$ -axis) to reach a certain error level ( $x$ -axis) for different methods. The errors are measured as distance from the input data to the fitted surface.
